# Supplementary material
Source: Springer Nature journal article supplement (https://www.springermedizin.de/resource/supplementary/12936_2012_2579_MOESM4_ESM.pdf/9543262)

**A**  
2003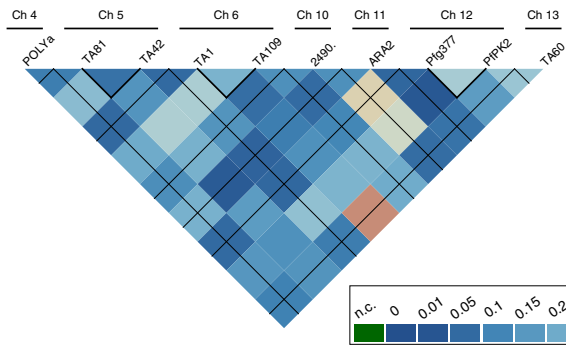**B**  
2004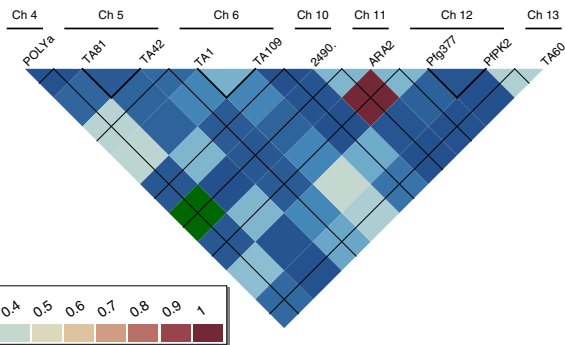**C**  
2003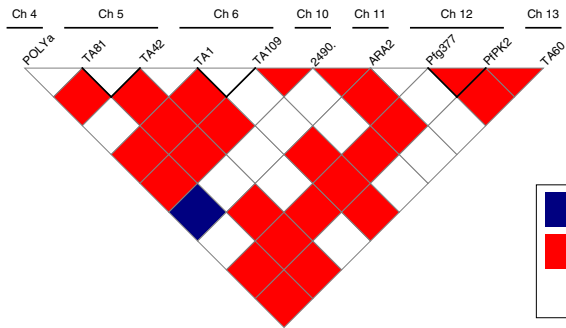**D**  
2004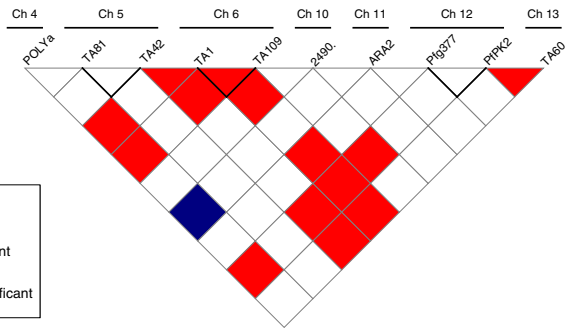

Supplement: MOESM4 [file 9543262]
